# Supplementary material
Source: publisher figshare collection journal article supplement (https://acs.figshare.com/ndownloader/files/5090371)
Supplement: Supplementary file 1 [file 5090371]

data_General
_audit_creation_date                  '2003-08-18'
_audit_creation_method                'by CrystalStructure v3.10'
_audit_update_record                   ?

#==============================================================================

# PROCESSING SUMMARY (IUCr Office Use Only)

_journal_date_recd_electronic     ?
_journal_date_from_coeditor       ?
_journal_date_accepted            ?
_journal_coeditor_code            ?

#==============================================================================

# SUBMISSION DETAILS

_publ_contact_author_name             ' Shin-ichi Naya '
_publ_contact_author_email            'snaya@ruri.waseda.jp'
_publ_contact_author_fax              '+81-3-3208-2735'
_publ_contact_author_phone            '+81-3-5286-3236'
_publ_contact_letter
;
    ENTER TEXT OF LETTER
;
_publ_requested_journal               'J. Org. Chem.'
_publ_requested_category              'CHOOSE FI FM FO CI CM CO or AD'
_publ_requested_coeditor_name          ?

#==============================================================================

# TITLE AND AUTHOR LIST

_publ_section_title
;
    ENTER SECTION TITLE
;
_publ_section_title_footnote
;
    ENTER FOOTNOTE TO TITLE OF PAPER
;
loop_
_publ_author_name
_publ_author_footnote
_publ_author_address
' FIRST AUTHORS NAME '
;
  FIRST AUTHORS FOOTNOTES
;
;
  FIRST AUTHORS ADDRESS
;
_publ_section_synopsis
;
  ENTER SYNOPSIS
;

#==============================================================================

# TEXT

_publ_section_abstract
;
    ENTER ABSTRACT
;
_publ_section_comment
;
    ENTER TEXT
;
_publ_section_references
;
    ENTER OTHER REFERENCES

    Rigaku/MSC and Rigaku Corporation. (2001).
    CrystalStructure.
    Single Crystal Structure Analysis Software. Version 3.10.
    Rigaku/MSC, 9009 New Trails Drive, The Woodlands, TX, USA 77381-5209.
    Rigaku, 3-9-12 Akishima, Tokyo 196-8666, Japan.

    Watkin, D.J., Prout, C.K. Carruthers, J.R. & Betteridge, P.W., 
    CRYSTALS Issue 10, Chemical Crystallography Laboratory, Oxford, UK.

;
_publ_section_figure_captions
;
    ENTER FIGURE CAPTIONS
;
_publ_section_exptl_prep
;
    ENTER COMPOUND PREPARATION DETAILS
;
_publ_section_exptl_refinement
;
    ENTER SPECIAL DETAILS OF THE REFINEMENT
;

#==============================================================================

data__JNNNA

#==============================================================================

# CHEMICAL DATA

_chemical_formula_sum                  'C31 H25 B F4 N6 O4 '
_chemical_formula_moiety               'C31 H25 B F4 N6 O4 '
_chemical_formula_weight               632.38
_chemical_melting_point                ?

#==============================================================================

# CRYSTAL DATA
_symmetry_cell_setting                 monoclinic
_symmetry_space_group_name_H-M        'P 1 21/n 1'
_symmetry_Int_Tables_number            14
loop_
_symmetry_equiv_pos_as_xyz
 'x,y,z'
 '-x,-y,-z'
 '-x+1/2,y+1/2,-z+1/2'
 'x+1/2,-y+1/2,z+1/2'

#------------------------------------------------------------------------------

_cell_length_a                         12.317(7)
_cell_length_b                         11.894(7)
_cell_length_c                         19.91(1)
_cell_angle_alpha                      90
_cell_angle_beta                       100.50(5)
_cell_angle_gamma                      90
_cell_volume                           2868.7(3)
_cell_formula_units_Z                  4
_cell_measurement_reflns_used          19122
_cell_measurement_theta_min            3.1
_cell_measurement_theta_max            27.6
_cell_measurement_temperature          123.1

#------------------------------------------------------------------------------

_exptl_crystal_description            'prism'
_exptl_crystal_colour                 'yellow'
_exptl_crystal_size_max                0.60
_exptl_crystal_size_mid                0.40
_exptl_crystal_size_min                0.20
_exptl_crystal_density_diffrn          1.464
_exptl_crystal_density_meas            ?
_exptl_crystal_density_method         'not measured'
_exptl_crystal_F_000                   1304.00
_exptl_absorpt_coefficient_mu          0.116
_exptl_absorpt_correction_type         numerical
_exptl_absorpt_process_details         
;
    Higashi, T. (1999). Program for Absorption Correction.
    Rigaku Corporation, Tokyo, Japan.
;
_exptl_absorpt_correction_T_min        1.000
_exptl_absorpt_correction_T_max        0.977

#==============================================================================

# EXPERIMENTAL DATA

_diffrn_radiation_type                'Mo K\a'
_diffrn_radiation_wavelength           0.7107
_diffrn_measurement_device_type       'Rigaku RAXIS-RAPID'
_diffrn_measurement_method             \w
_diffrn_detector_area_resol_mean       10.00
_diffrn_reflns_number                  24755
_diffrn_reflns_av_R_equivalents        0.044
_diffrn_reflns_theta_max               27.49
_diffrn_measured_fraction_theta_max    0.9932
_diffrn_reflns_theta_full              27.49
_diffrn_measured_fraction_theta_full   0.9932
_diffrn_reflns_limit_h_min             -15
_diffrn_reflns_limit_h_max             15
_diffrn_reflns_limit_k_min             -15
_diffrn_reflns_limit_k_max             15
_diffrn_reflns_limit_l_min             -25
_diffrn_reflns_limit_l_max             25

#==============================================================================

# REFINEMENT DATA

_refine_special_details
;
    Refinement using reflections with F^2^ > 3.0 sigma(F^2^).
    The weighted R-factor (wR), goodness of fit (S) and R-factor (gt) are 
    based on F, with F set to zero for negative F. The threshold expression of
    F^2^ > 2.0 sigma(F^2^) is used only for calculating R-factor (gt).
;
_reflns_number_total                   6534
_reflns_number_gt                      3386
_reflns_threshold_expression           F^2^>2.0\s(F^2^)
_refine_ls_structure_factor_coef       F
_refine_ls_R_factor_gt                 0.0360
_refine_ls_wR_factor_ref               0.0500
_refine_ls_hydrogen_treatment          refall
_refine_ls_number_reflns               3386
_refine_ls_number_parameters           440
_refine_ls_goodness_of_fit_ref         1.077
_refine_ls_weighting_scheme            calc
_refine_ls_weighting_details
'w = 1/[0.0010Fo^2^ + 0.1000\s^2^(Fo) + 0.0500]'
_refine_ls_shift/su_max                0.0000
_refine_diff_density_max               0.29
_refine_diff_density_min               -0.25
_refine_ls_extinction_method           none
_refine_ls_extinction_coef             ?

loop_
_atom_type_symbol
_atom_type_description
_atom_type_scat_dispersion_real
_atom_type_scat_dispersion_imag
_atom_type_scat_source
  'C' 'C'  0.003 0.002 
;
International Tables for Crystallography
(1992, Vol. C, Tables 4.2.6.8 and 6.1.1.4)
;
  'H' 'H'  0.000 0.000 
;
International Tables for Crystallography
(1992, Vol. C, Table 6.1.1.4)
;
  'O' 'O'  0.011 0.006 
;
International Tables for Crystallography
(1992, Vol. C, Tables 4.2.6.8 and 6.1.1.4)
;
  'N' 'N'  0.006 0.003 
;
International Tables for Crystallography
(1992, Vol. C, Tables 4.2.6.8 and 6.1.1.4)
;
  'B' 'B'  0.001 0.001 
;
International Tables for Crystallography
(1992, Vol. C, Tables 4.2.6.8 and 6.1.1.4)
;
  'F' 'F'  0.017 0.010 
;
International Tables for Crystallography
(1992, Vol. C, Tables 4.2.6.8 and 6.1.1.4)
;

#==============================================================================

# ATOMIC COORDINATES AND THERMAL PARAMETERS

loop_
_atom_site_label
_atom_site_type_symbol
_atom_site_fract_x
_atom_site_fract_y
_atom_site_fract_z
_atom_site_U_iso_or_equiv
_atom_site_adp_type
_atom_site_occupancy
_atom_site_symmetry_multiplicity
_atom_site_calc_flag
_atom_site_refinement_flags
_atom_site_disorder_assembly
_atom_site_disorder_group
 F1     F  0.0523(2)   0.7234(2)   0.3022(1)   0.0590(6)   Uani 1.00 1 d . . .
 F2     F  0.2251(1)   0.7806(2)   0.3482(1)   0.0667(7)   Uani 1.00 1 d . . .
 F3     F  0.1094(2)   0.8972(2)   0.2808(1)   0.0730(7)   Uani 1.00 1 d . . .
 F4     F  0.0778(2)   0.8535(2)   0.3851(1)   0.0609(7)   Uani 1.00 1 d . . .
 O1     O  -0.1666(1)  0.8822(1)   0.46905(9)  0.0261(4)   Uani 1.00 1 d . . .
 O2     O  0.1550(1)   0.6974(1)   0.54861(8)  0.0249(4)   Uani 1.00 1 d . . .
 O3     O  0.2440(2)   -0.0059(2)  0.18449(9)  0.0342(5)   Uani 1.00 1 d . . .
 O4     O  -0.0271(1)  0.2453(2)   0.20501(9)  0.0336(5)   Uani 1.00 1 d . . .
 N1     N  -0.0809(1)  0.5481(2)   0.36333(9)  0.0184(5)   Uani 1.00 1 d . . .
 N2     N  -0.1366(1)  0.7206(2)   0.4139(1)   0.0190(5)   Uani 1.00 1 d . . .
 N3     N  -0.0086(2)  0.7861(2)   0.5105(1)   0.0208(5)   Uani 1.00 1 d . . .
 N4     N  0.2761(1)   0.2250(2)   0.3790(1)   0.0200(5)   Uani 1.00 1 d . . .
 N5     N  0.2657(2)   0.0922(2)   0.2838(1)   0.0229(5)   Uani 1.00 1 d . . .
 N6     N  0.1083(2)   0.1182(2)   0.1948(1)   0.0242(5)   Uani 1.00 1 d . . .
 C1     C  0.0222(2)   0.3871(2)   0.3354(1)   0.0186(5)   Uani 1.00 1 d . . .
 C2     C  0.0125(2)   0.4780(2)   0.3762(1)   0.0183(5)   Uani 1.00 1 d . . .
 C3     C  0.0858(2)   0.5231(2)   0.4347(1)   0.0181(5)   Uani 1.00 1 d . . .
 C4     C  0.1871(2)   0.4781(2)   0.4669(1)   0.0194(6)   Uani 1.00 1 d . . .
 C5     C  0.2406(2)   0.3827(2)   0.4501(1)   0.0203(6)   Uani 1.00 1 d . . .
 C6     C  0.1121(2)   0.3140(2)   0.3422(1)   0.0190(6)   Uani 1.00 1 d . . .
 C7     C  0.2082(2)   0.3118(2)   0.3948(1)   0.0195(6)   Uani 1.00 1 d . . .
 C8     C  0.0335(2)   0.6211(2)   0.4537(1)   0.0184(5)   Uani 1.00 1 d . . .
 C9     C  -0.0661(2)  0.6342(2)   0.4094(1)   0.0179(5)   Uani 1.00 1 d . . .
 C10    C  0.1263(2)   0.2284(2)   0.2953(1)   0.0214(6)   Uani 1.00 1 d . . .
 C11    C  0.2260(2)   0.1766(2)   0.3181(1)   0.0207(6)   Uani 1.00 1 d . . .
 C12    C  -0.2454(2)  0.7337(2)   0.3691(1)   0.0284(6)   Uani 1.00 1 d . . .
 C13    C  -0.1065(2)  0.8024(2)   0.4648(1)   0.0199(6)   Uani 1.00 1 d . . .
 C14    C  0.0221(2)   0.8732(2)   0.5629(1)   0.0253(6)   Uani 1.00 1 d . . .
 C15    C  0.0686(2)   0.7006(2)   0.5074(1)   0.0185(6)   Uani 1.00 1 d . . .
 C16    C  0.3597(2)   0.0188(2)   0.3108(1)   0.0329(7)   Uani 1.00 1 d . . .
 C17    C  0.2081(2)   0.0639(2)   0.2184(1)   0.0250(6)   Uani 1.00 1 d . . .
 C18    C  0.0531(2)   0.0871(3)   0.1258(1)   0.0360(8)   Uani 1.00 1 d . . .
 C19    C  0.0607(2)   0.2008(2)   0.2300(1)   0.0240(6)   Uani 1.00 1 d . . .
 C20    C  -0.1707(2)  0.5279(2)   0.3069(1)   0.0184(5)   Uani 1.00 1 d . . .
 C21    C  -0.1677(2)  0.5749(2)   0.2439(1)   0.0271(6)   Uani 1.00 1 d . . .
 C22    C  -0.2541(2)  0.5527(3)   0.1902(1)   0.0347(7)   Uani 1.00 1 d . . .
 C23    C  -0.3408(2)  0.4847(2)   0.2001(1)   0.0303(7)   Uani 1.00 1 d . . .
 C24    C  -0.3418(2)  0.4372(2)   0.2632(1)   0.0317(7)   Uani 1.00 1 d . . .
 C25    C  -0.2556(2)  0.4576(2)   0.3170(1)   0.0264(6)   Uani 1.00 1 d . . .
 C26    C  0.3885(2)   0.2108(2)   0.4138(1)   0.0220(6)   Uani 1.00 1 d . . .
 C27    C  0.4728(2)   0.2522(2)   0.3836(1)   0.0288(7)   Uani 1.00 1 d . . .
 C28    C  0.5814(2)   0.2421(3)   0.4184(2)   0.0366(8)   Uani 1.00 1 d . . .
 C29    C  0.6039(2)   0.1941(3)   0.4826(2)   0.0391(8)   Uani 1.00 1 d . . .
 C30    C  0.5185(2)   0.1545(3)   0.5124(1)   0.0370(8)   Uani 1.00 1 d . . .
 C31    C  0.4097(2)   0.1617(2)   0.4780(1)   0.0285(7)   Uani 1.00 1 d . . .
 B1     B  0.1177(3)   0.8139(3)   0.3299(2)   0.0327(8)   Uani 1.00 1 d . . .
 H1     H  -0.0352(2)  0.3732(2)   0.2945(1)   0.022(1)    Uiso 1.00 1 c . . .
 H2     H  0.2237(2)   0.5214(2)   0.5044(1)   0.022(1)    Uiso 1.00 1 c . . .
 H3     H  0.3123(2)   0.3671(2)   0.4780(1)   0.024(1)    Uiso 1.00 1 c . . .
 H4     H  0.0636(2)   0.9204(2)   0.5483(1)   0.030(1)    Uiso 1.00 1 c . . .
 H5     H  0.0536(2)   0.8364(2)   0.6023(1)   0.030(1)    Uiso 1.00 1 c . . .
 H6     H  -0.0404(2)  0.9084(2)   0.5743(1)   0.030(1)    Uiso 1.00 1 c . . .
 H7     H  -0.2752(2)  0.7952(2)   0.3842(1)   0.033(1)    Uiso 1.00 1 c . . .
 H8     H  -0.2312(2)  0.7502(2)   0.3322(1)   0.033(1)    Uiso 1.00 1 c . . .
 H9     H  -0.2822(2)  0.6762(2)   0.3782(1)   0.033(1)    Uiso 1.00 1 c . . .
 H10    H  0.3733(2)   0.0186(2)   0.3529(1)   0.039(1)    Uiso 1.00 1 c . . .
 H11    H  0.4183(2)   0.0496(2)   0.2929(1)   0.039(1)    Uiso 1.00 1 c . . .
 H12    H  0.3433(2)   -0.0574(2)  0.2909(1)   0.039(1)    Uiso 1.00 1 c . . .
 H13    H  -0.1069(2)  0.6227(2)   0.2369(1)   0.032(1)    Uiso 1.00 1 c . . .
 H14    H  -0.2611(2)  0.5956(3)   0.1430(1)   0.041(1)    Uiso 1.00 1 c . . .
 H15    H  -0.4072(2)  0.4597(2)   0.1613(1)   0.034(1)    Uiso 1.00 1 c . . .
 H16    H  -0.3998(2)  0.3840(2)   0.2707(1)   0.037(1)    Uiso 1.00 1 c . . .
 H17    H  -0.2503(2)  0.4204(2)   0.3590(1)   0.031(1)    Uiso 1.00 1 c . . .
 H18    H  0.3540(2)   0.1333(2)   0.4968(1)   0.034(1)    Uiso 1.00 1 c . . .
 H19    H  0.5295(2)   0.1170(3)   0.5604(1)   0.043(1)    Uiso 1.00 1 c . . .
 H20    H  0.6793(2)   0.1764(3)   0.5141(2)   0.045(1)    Uiso 1.00 1 c . . .
 H21    H  0.6454(2)   0.2723(3)   0.3923(2)   0.044(1)    Uiso 1.00 1 c . . .
 H22    H  0.4648(2)   0.2787(2)   0.3396(1)   0.035(1)    Uiso 1.00 1 c . . .
 H23    H  -0.0134(2)  0.1288(3)   0.1143(1)   0.043(1)    Uiso 1.00 1 c . . .
 H24    H  0.1001(2)   0.1039(3)   0.0943(1)   0.043(1)    Uiso 1.00 1 c . . .
 H25    H  0.0367(2)   0.0090(3)   0.1242(1)   0.043(1)    Uiso 1.00 1 c . . .


loop_
_atom_site_aniso_label
_atom_site_aniso_U_11
_atom_site_aniso_U_22
_atom_site_aniso_U_33
_atom_site_aniso_U_12
_atom_site_aniso_U_13
_atom_site_aniso_U_23
 F1     0.061(1)    0.066(1)    0.047(1)    -0.030(1)   0.004(1)    0.001(1)   
 F2     0.032(1)    0.068(1)    0.094(2)    0.014(1)    -0.003(1)   -0.008(1)  
 F3     0.056(1)    0.085(2)    0.072(1)    -0.025(1)   -0.004(1)   0.047(1)   
 F4     0.074(1)    0.053(1)    0.063(1)    -0.001(1)   0.033(1)    -0.004(1)  
 O1     0.0228(9)   0.0236(9)   0.0300(9)   0.0033(7)   0.0001(7)   -0.0052(8) 
 O2     0.0188(8)   0.031(1)    0.0225(8)   -0.0014(7)  -0.0035(7)  -0.0019(8) 
 O3     0.036(1)    0.036(1)    0.031(1)    0.0113(9)   0.0080(8)   -0.0077(9) 
 O4     0.0255(9)   0.037(1)    0.034(1)    0.0081(8)   -0.0061(8)  -0.0130(9) 
 N1     0.0166(9)   0.020(1)    0.0177(9)   0.0003(8)   0.0001(7)   -0.0009(8) 
 N2     0.0149(9)   0.021(1)    0.0199(9)   0.0011(8)   0.0002(7)   -0.0001(8) 
 N3     0.019(1)    0.023(1)    0.019(1)    -0.0022(8)  0.0009(8)   -0.0023(8) 
 N4     0.0158(9)   0.023(1)    0.0207(9)   0.0021(8)   0.0013(8)   0.0017(8)  
 N5     0.020(1)    0.021(1)    0.027(1)    0.0026(8)   0.0043(8)   0.0001(9)  
 N6     0.023(1)    0.025(1)    0.024(1)    0.0007(9)   0.0032(8)   -0.0043(9) 
 C1     0.014(1)    0.021(1)    0.019(1)    -0.0014(9)  -0.0002(9)  0.001(1)   
 C2     0.013(1)    0.022(1)    0.020(1)    -0.0009(9)  0.0016(8)   0.004(1)   
 C3     0.017(1)    0.021(1)    0.016(1)    -0.0046(9)  0.0044(8)   0.0020(9)  
 C4     0.015(1)    0.026(1)    0.016(1)    -0.0003(9)  -0.0016(8)  0.001(1)   
 C5     0.015(1)    0.026(1)    0.019(1)    -0.001(1)   -0.0006(9)  0.003(1)   
 C6     0.016(1)    0.021(1)    0.020(1)    -0.0048(9)  0.0041(9)   0.001(1)   
 C7     0.016(1)    0.022(1)    0.021(1)    -0.0003(9)  0.0051(9)   0.005(1)   
 C8     0.014(1)    0.023(1)    0.018(1)    -0.0009(9)  0.0011(9)   0.003(1)   
 C9     0.017(1)    0.018(1)    0.019(1)    -0.0028(9)  0.0037(9)   0.0017(9)  
 C10    0.017(1)    0.021(1)    0.026(1)    -0.0014(9)  0.0042(9)   -0.001(1)  
 C11    0.017(1)    0.021(1)    0.024(1)    -0.0012(9)  0.006(1)    0.002(1)   
 C12    0.021(1)    0.029(1)    0.033(1)    0.006(1)    -0.003(1)   -0.004(1)  
 C13    0.017(1)    0.022(1)    0.021(1)    -0.003(1)   0.0038(9)   -0.000(1)  
 C14    0.024(1)    0.025(1)    0.025(1)    -0.003(1)   0.000(1)    -0.006(1)  
 C15    0.017(1)    0.021(1)    0.017(1)    -0.0014(9)  0.0030(9)   0.0001(9)  
 C16    0.028(1)    0.031(1)    0.037(1)    0.008(1)    0.002(1)    -0.001(1)  
 C17    0.026(1)    0.024(1)    0.026(1)    0.000(1)    0.008(1)    0.001(1)   
 C18    0.039(2)    0.038(2)    0.029(1)    0.009(1)    0.000(1)    -0.010(1)  
 C19    0.021(1)    0.023(1)    0.027(1)    -0.002(1)   0.004(1)    -0.002(1)  
 C20    0.014(1)    0.021(1)    0.018(1)    0.0015(9)   -0.0019(8)  -0.003(1)  
 C21    0.019(1)    0.035(1)    0.026(1)    -0.005(1)   0.001(1)    0.006(1)   
 C22    0.030(1)    0.049(2)    0.023(1)    -0.003(1)   -0.002(1)   0.008(1)   
 C23    0.026(1)    0.034(1)    0.025(1)    -0.002(1)   -0.009(1)   0.001(1)   
 C24    0.026(1)    0.031(1)    0.034(1)    -0.010(1)   -0.004(1)   0.005(1)   
 C25    0.022(1)    0.030(1)    0.024(1)    -0.004(1)   -0.002(1)   0.006(1)   
 C26    0.016(1)    0.022(1)    0.027(1)    0.0037(9)   0.0007(9)   -0.001(1)  
 C27    0.023(1)    0.032(1)    0.031(1)    -0.000(1)   0.005(1)    0.003(1)   
 C28    0.018(1)    0.038(2)    0.052(2)    -0.003(1)   0.005(1)    -0.001(1)  
 C29    0.022(1)    0.042(2)    0.048(2)    0.006(1)    -0.008(1)   -0.005(1)  
 C30    0.035(2)    0.039(2)    0.033(1)    0.010(1)    -0.005(1)   0.003(1)   
 C31    0.026(1)    0.030(1)    0.029(1)    0.008(1)    0.005(1)    0.005(1)   
 B1     0.024(2)    0.041(2)    0.032(2)    -0.003(1)   0.003(1)    0.007(1)   

#==============================================================================

_computing_data_collection            'PROCESS-AUTO'
_computing_cell_refinement            'PROCESS-AUTO'
_computing_data_reduction             'CrystalStructure'
_computing_structure_solution         'SIR92'
_computing_structure_refinement       'CRYSTALS'
_computing_publication_material       'CrystalStructure Ver. 3.10'
_computing_molecular_graphics          ?

#==============================================================================

# MOLECULAR GEOMETRY

_geom_special_details
;
    ENTER SPECIAL DETAILS OF THE MOLECULAR GEOMETRY
;

loop_
 _geom_bond_atom_site_label_1
 _geom_bond_site_symmetry_1
 _geom_bond_atom_site_label_2
 _geom_bond_site_symmetry_2
 _geom_bond_distance
 _geom_bond_publ_flag
F1 . B1 . 1.397(4) yes
F2 . B1 . 1.366(4) yes
F3 . B1 . 1.384(4) yes
F4 . B1 . 1.366(4) yes
O1 . C13 . 1.216(3) yes
O2 . C15 . 1.220(3) yes
O3 . C17 . 1.204(3) yes
O4 . C19 . 1.225(3) yes
N1 . C2 . 1.405(3) yes
N1 . C9 . 1.366(3) yes
N1 . C20 . 1.446(3) yes
N2 . C9 . 1.358(3) yes
N2 . C12 . 1.476(3) yes
N2 . C13 . 1.407(3) yes
N3 . C13 . 1.385(3) yes
N3 . C14 . 1.472(3) yes
N3 . C15 . 1.401(3) yes
N4 . C7 . 1.401(3) yes
N4 . C11 . 1.382(3) yes
N4 . C26 . 1.440(3) yes
N5 . C11 . 1.354(3) yes
N5 . C16 . 1.471(3) yes
N5 . C17 . 1.406(3) yes
N6 . C17 . 1.392(3) yes
N6 . C18 . 1.465(3) yes
N6 . C19 . 1.397(3) yes
C1 . C2 . 1.371(3) yes
C1 . C6 . 1.395(3) yes
C1 . H1 . 0.99(3) no
C2 . C3 . 1.441(3) yes
C3 . C4 . 1.401(3) yes
C3 . C8 . 1.416(3) yes
C4 . C5 . 1.383(3) yes
C4 . H2 . 0.95(2) no
C5 . C7 . 1.386(3) yes
C5 . H3 . 0.97(3) no
C6 . C7 . 1.430(3) yes
C6 . C10 . 1.414(3) yes
C8 . C9 . 1.383(3) yes
C8 . C15 . 1.435(3) yes
C10 . C11 . 1.375(3) yes
C10 . C19 . 1.438(3) yes
C12 . H7 . 0.895(7) no
C12 . H8 . 0.810(8) no
C12 . H9 . 0.857(6) no
C14 . H4 . 0.846(9) no
C14 . H5 . 0.92(2) no
C14 . H6 . 0.94(1) no
C16 . H10 . 0.825(9) no
C16 . H11 . 0.94(1) no
C16 . H12 . 0.995(6) no
C18 . H23 . 0.95(1) no
C18 . H24 . 0.95(2) no
C18 . H25 . 0.950(4) no
C20 . C21 . 1.380(3) yes
C20 . C25 . 1.382(3) yes
C21 . C22 . 1.390(4) yes
C21 . H13 . 0.971(6) no
C22 . C23 . 1.383(4) yes
C22 . H14 . 1.060(5) no
C23 . C24 . 1.380(4) yes
C23 . H15 . 1.06(3) no
C24 . C25 . 1.385(4) yes
C24 . H16 . 0.985(6) no
C25 . H17 . 0.938(5) no
C26 . C27 . 1.383(3) yes
C26 . C31 . 1.387(4) yes
C27 . C28 . 1.395(4) yes
C27 . H22 . 0.919(6) no
C28 . C29 . 1.382(4) yes
C28 . H21 . 1.08(2) no
C29 . C30 . 1.381(4) yes
C29 . H20 . 1.04(3) no
C30 . C31 . 1.392(4) yes
C30 . H19 . 1.040(7) no
C31 . H18 . 0.90(1) no
F2 . F4 . 2.251(3) yes
F4 . N2 . 3.218(3) yes
O2 . C4 . 3.138(3) yes
O2 . C14 . 2.703(3) yes
O2 . H4 . 2.880(3) no
O4 . H23 . 2.307(3) no
O4 . H24 . 3.378(4) no
O4 . H25 . 3.401(4) no
N4 . C26 . 1.440(3) yes
N4 . C27 . 2.429(3) yes
N4 . H22 . 2.663(3) no
C2 . C4 . 2.544(3) yes
C4 . H2 . 0.9511(5) no
C20 . C24 . 2.386(4) yes
C20 . H14 . 3.350(4) no
C21 . C24 . 2.781(4) yes
C21 . H14 . 2.141(4) no
C22 . C24 . 2.397(4) yes
C22 . H14 . 1.0596(5) no
C23 . C24 . 1.380(4) yes
C23 . H14 . 2.100(4) no
C24 . C25 . 1.385(4) yes
C24 . H14 . 3.339(4) no
H23 . H24 . 1.5513(8) no
H24 . H25 . 1.5514(6) no
C13 . C15 . 2.484(3) yes
C13 . H5 . 3.095(4) no
C25 . H13 . 3.290(4) no
C17 . C18 . 2.416(4) yes
F3 . F4 . 2.244(3) yes
F2 . F4 . 2.251(3) yes
F4 . N2 . 3.218(3) yes
F3 . F4 . 2.244(3) yes
F4 . N3 . 2.996(3) yes
F4 . C13 . 3.058(3) yes
C12 . C20 . 2.964(4) yes
C12 . C21 . 3.401(4) yes
C12 . C25 . 3.440(4) yes
C6 . C7 . 1.430(3) yes
C6 . C19 . 2.586(4) yes
N6 . C10 . 2.368(3) yes
C6 . C10 . 1.414(3) yes
C7 . C10 . 2.281(4) yes
C10 . C17 . 2.784(4) yes
C8 . C15 . 1.435(3) yes
C18 . H24 . 0.9500(5) no
N6 . C19 . 1.397(3) yes
C6 . C19 . 2.586(4) yes
C26 . C29 . 2.763(4) yes
C27 . C29 . 2.412(4) yes
C28 . H19 . 3.358(5) no
C29 . H20 . 1.0431(6) no
F2 . B1 . 1.366(4) yes
F4 . B1 . 1.366(4) yes
H24 . H25 . 1.5514(6) no

loop_
 _geom_angle_atom_site_label_1
 _geom_angle_site_symmetry_1
 _geom_angle_atom_site_label_2
 _geom_angle_site_symmetry_2
 _geom_angle_atom_site_label_3
 _geom_angle_site_symmetry_3
 _geom_angle
 _geom_angle_publ_flag
C2 . N1 . C9 . 108.56(18) yes
C2 . N1 . C20 . 121.83(19) yes
C9 . N1 . C20 . 129.54(19) yes
C9 . N2 . C12 . 124.2(2) yes
C9 . N2 . C13 . 118.84(19) yes
C12 . N2 . C13 . 116.99(19) yes
C13 . N3 . C14 . 116.6(2) yes
C13 . N3 . C15 . 126.2(2) yes
C14 . N3 . C15 . 117.0(2) yes
C7 . N4 . C11 . 108.35(19) yes
C7 . N4 . C26 . 122.6(2) yes
C11 . N4 . C26 . 127.6(2) yes
C11 . N5 . C16 . 126.0(2) yes
C11 . N5 . C17 . 118.5(2) yes
C16 . N5 . C17 . 115.3(2) yes
C17 . N6 . C18 . 115.5(2) yes
C17 . N6 . C19 . 125.7(2) yes
C18 . N6 . C19 . 118.8(2) yes
C2 . C1 . C6 . 126.0(2) yes
C2 . C1 . H1 . 119.5(3) no
C6 . C1 . H1 . 114.3(2) no
N1 . C2 . C1 . 121.1(2) yes
N1 . C2 . C3 . 107.3(2) yes
C1 . C2 . C3 . 131.6(2) yes
C2 . C3 . C4 . 127.0(2) yes
C2 . C3 . C8 . 105.9(2) yes
C4 . C3 . C8 . 127.1(2) yes
C3 . C4 . C5 . 128.8(2) yes
C3 . C4 . H2 . 114.0(3) no
C5 . C4 . H2 . 117.1(3) no
C4 . C5 . C7 . 127.6(2) yes
C4 . C5 . H3 . 116.2(3) no
C7 . C5 . H3 . 116.0(3) no
C1 . C6 . C7 . 128.2(2) yes
C1 . C6 . C10 . 125.2(2) yes
C7 . C6 . C10 . 106.6(2) yes
N4 . C7 . C5 . 122.0(2) yes
N4 . C7 . C6 . 107.3(2) yes
C5 . C7 . C6 . 130.6(2) yes
C3 . C8 . C9 . 108.5(2) yes
C3 . C8 . C15 . 130.7(2) yes
C9 . C8 . C15 . 120.8(2) yes
N1 . C9 . N2 . 127.0(2) yes
N1 . C9 . C8 . 109.7(2) yes
N2 . C9 . C8 . 123.2(2) yes
C6 . C10 . C11 . 108.3(2) yes
C6 . C10 . C19 . 130.1(2) yes
C11 . C10 . C19 . 121.2(2) yes
N4 . C11 . N5 . 127.3(2) yes
N4 . C11 . C10 . 109.4(2) yes
N5 . C11 . C10 . 123.2(2) yes
N2 . C12 . H7 . 105.4(3) no
N2 . C12 . H8 . 104.5(3) no
H7 . C12 . H8 . 106.0(4) no
N2 . C12 . H9 . 104.2(3) no
H7 . C12 . H9 . 108.5(4) no
H8 . C12 . H9 . 126.5(4) no
O1 . C13 . N2 . 120.4(2) yes
O1 . C13 . N3 . 122.2(2) yes
N2 . C13 . N3 . 117.4(2) yes
N3 . C14 . H4 . 108.4(3) no
N3 . C14 . H5 . 106.5(3) no
H4 . C14 . H5 . 114.9(4) no
N3 . C14 . H6 . 111.7(3) no
H4 . C14 . H6 . 111.2(3) no
H5 . C14 . H6 . 104.1(3) no
O2 . C15 . N3 . 120.6(2) yes
O2 . C15 . C8 . 126.0(2) yes
N3 . C15 . C8 . 113.3(2) yes
N5 . C16 . H10 . 111.9(3) no
N5 . C16 . H11 . 103.9(3) no
H10 . C16 . H11 . 111.1(4) no
N5 . C16 . H12 . 107.8(3) no
H10 . C16 . H12 . 113.0(4) no
H11 . C16 . H12 . 108.7(4) no
O3 . C17 . N5 . 120.7(2) yes
O3 . C17 . N6 . 121.5(2) yes
N5 . C17 . N6 . 117.8(2) yes
N6 . C18 . H23 . 109.2(3) no
N6 . C18 . H24 . 109.5(3) no
H23 . C18 . H24 . 109.5(4) no
N6 . C18 . H25 . 109.8(3) no
H23 . C18 . H25 . 109.5(4) no
H24 . C18 . H25 . 109.5(4) no
O4 . C19 . N6 . 121.4(2) yes
O4 . C19 . C10 . 125.3(2) yes
N6 . C19 . C10 . 113.3(2) yes
N1 . C20 . C21 . 119.7(2) yes
N1 . C20 . C25 . 118.7(2) yes
C21 . C20 . C25 . 121.6(2) yes
C20 . C21 . C22 . 118.6(2) yes
C20 . C21 . H13 . 121.2(3) no
C22 . C21 . H13 . 120.2(3) no
C21 . C22 . C23 . 120.2(2) yes
C21 . C22 . H14 . 121.3(3) no
C23 . C22 . H14 . 118.0(3) no
C22 . C23 . C24 . 120.4(2) yes
C22 . C23 . H15 . 124.9(3) no
C24 . C23 . H15 . 114.5(3) no
C23 . C24 . C25 . 119.9(2) yes
C23 . C24 . H16 . 121.8(3) no
C25 . C24 . H16 . 118.1(3) no
C20 . C25 . C24 . 119.2(2) yes
C20 . C25 . H17 . 118.9(3) no
C24 . C25 . H17 . 121.7(3) no
N4 . C26 . C27 . 118.7(2) yes
N4 . C26 . C31 . 119.8(2) yes
C27 . C26 . C31 . 121.4(2) yes
C26 . C27 . C28 . 118.7(2) yes
C26 . C27 . H22 . 125.4(3) no
C28 . C27 . H22 . 115.4(3) no
C27 . C28 . C29 . 120.6(3) yes
C27 . C28 . H21 . 116.7(3) no
C29 . C28 . H21 . 122.7(3) no
C28 . C29 . C30 . 119.9(3) yes
C28 . C29 . H20 . 130.3(3) no
C30 . C29 . H20 . 109.7(3) no
C29 . C30 . C31 . 120.5(3) yes
C29 . C30 . H19 . 124.0(3) no
C31 . C30 . H19 . 115.5(3) no
C26 . C31 . C30 . 118.8(3) yes
C26 . C31 . H18 . 120.5(3) no
C30 . C31 . H18 . 120.6(3) no
F1 . B1 . F2 . 110.0(3) yes
F1 . B1 . F3 . 108.0(2) yes
F2 . B1 . F3 . 109.9(3) yes
F1 . B1 . F4 . 108.5(2) yes
F2 . B1 . F4 . 111.0(3) yes
F3 . B1 . F4 . 109.4(3) yes

loop_
 _geom_torsion_atom_site_label_1
 _geom_torsion_site_symmetry_1
 _geom_torsion_atom_site_label_2
 _geom_torsion_site_symmetry_2
 _geom_torsion_atom_site_label_3
 _geom_torsion_site_symmetry_3
 _geom_torsion_atom_site_label_4
 _geom_torsion_site_symmetry_4
 _geom_torsion
 _geom_torsion_publ_flag
C9 . N1 . C2 . C1 . -177.1(2) yes
C9 . N1 . C2 . C3 . 1.8(3) yes
C20 . N1 . C2 . C1 . 0.0(3) yes
C20 . N1 . C2 . C3 . 178.9(2) yes
C2 . N1 . C9 . N2 . 179.2(2) yes
C2 . N1 . C9 . C8 . -1.6(3) yes
C20 . N1 . C9 . N2 . 2.4(4) yes
C20 . N1 . C9 . C8 . -178.4(2) yes
C2 . N1 . C20 . C21 . -89.1(3) yes
C2 . N1 . C20 . C25 . 88.2(3) yes
C9 . N1 . C20 . C21 . 87.4(3) yes
C9 . N1 . C20 . C25 . -95.3(3) yes
C12 . N2 . C9 . N1 . 1.7(4) yes
C12 . N2 . C9 . C8 . -177.3(2) yes
C13 . N2 . C9 . N1 . -179.5(2) yes
C13 . N2 . C9 . C8 . 1.5(4) yes
C9 . N2 . C13 . O1 . 178.2(2) yes
C9 . N2 . C13 . N3 . -3.9(3) yes
C12 . N2 . C13 . O1 . -2.9(4) yes
C12 . N2 . C13 . N3 . 175.0(2) yes
C14 . N3 . C13 . O1 . -2.7(4) yes
C14 . N3 . C13 . N2 . 179.4(2) yes
C15 . N3 . C13 . O1 . -176.2(2) yes
C15 . N3 . C13 . N2 . 5.9(4) yes
C13 . N3 . C15 . O2 . 176.3(2) yes
C13 . N3 . C15 . C8 . -4.9(3) yes
C14 . N3 . C15 . O2 . 2.9(3) yes
C14 . N3 . C15 . C8 . -178.3(2) yes
C11 . N4 . C7 . C5 . -174.4(2) yes
C11 . N4 . C7 . C6 . 1.5(3) yes
C26 . N4 . C7 . C5 . -7.2(4) yes
C26 . N4 . C7 . C6 . 168.6(2) yes
C7 . N4 . C11 . N5 . 177.9(2) yes
C7 . N4 . C11 . C10 . -1.5(3) yes
C26 . N4 . C11 . N5 . 11.5(4) yes
C26 . N4 . C11 . C10 . -167.9(2) yes
C7 . N4 . C26 . C27 . -98.0(3) yes
C7 . N4 . C26 . C31 . 78.6(3) yes
C11 . N4 . C26 . C27 . 66.6(3) yes
C11 . N4 . C26 . C31 . -116.8(3) yes
C16 . N5 . C11 . N4 . 13.3(4) yes
C16 . N5 . C11 . C10 . -167.4(3) yes
C17 . N5 . C11 . N4 . -172.5(2) yes
C17 . N5 . C11 . C10 . 6.8(4) yes
C11 . N5 . C17 . O3 . 175.5(2) yes
C11 . N5 . C17 . N6 . -5.1(3) yes
C16 . N5 . C17 . O3 . -9.6(4) yes
C16 . N5 . C17 . N6 . 169.8(2) yes
C18 . N6 . C17 . O3 . -1.9(4) yes
C18 . N6 . C17 . N5 . 178.7(2) yes
C19 . N6 . C17 . O3 . -179.3(2) yes
C19 . N6 . C17 . N5 . 1.3(4) yes
C17 . N6 . C19 . O4 . 179.1(2) yes
C17 . N6 . C19 . C10 . 1.0(4) yes
C18 . N6 . C19 . O4 . 1.8(4) yes
C18 . N6 . C19 . C10 . -176.3(2) yes
C6 . C1 . C2 . N1 . 178.1(2) yes
C6 . C1 . C2 . C3 . -0.5(4) yes
C2 . C1 . C6 . C7 . 5.2(4) yes
C2 . C1 . C6 . C10 . -172.4(2) yes
N1 . C2 . C3 . C4 . 177.7(2) yes
N1 . C2 . C3 . C8 . -1.3(2) yes
C1 . C2 . C3 . C4 . -3.5(4) yes
C1 . C2 . C3 . C8 . 177.4(2) yes
C2 . C3 . C4 . C5 . 1.0(4) yes
C8 . C3 . C4 . C5 . 179.8(2) yes
C2 . C3 . C8 . C9 . 0.4(3) yes
C2 . C3 . C8 . C15 . -179.1(2) yes
C4 . C3 . C8 . C9 . -178.7(2) yes
C4 . C3 . C8 . C15 . 1.9(4) yes
C3 . C4 . C5 . C7 . 3.4(4) yes
C4 . C5 . C7 . N4 . 172.5(2) yes
C4 . C5 . C7 . C6 . -2.2(4) yes
C1 . C6 . C7 . N4 . -178.9(2) yes
C1 . C6 . C7 . C5 . -3.6(4) yes
C10 . C6 . C7 . N4 . -0.9(3) yes
C10 . C6 . C7 . C5 . 174.4(2) yes
C1 . C6 . C10 . C11 . 178.1(2) yes
C1 . C6 . C10 . C19 . 4.9(4) yes
C7 . C6 . C10 . C11 . -0.0(3) yes
C7 . C6 . C10 . C19 . -173.2(2) yes
C3 . C8 . C9 . N1 . 0.8(3) yes
C3 . C8 . C9 . N2 . 179.9(2) yes
C15 . C8 . C9 . N1 . -179.7(2) yes
C15 . C8 . C9 . N2 . -0.6(4) yes
C3 . C8 . C15 . O2 . 0.1(4) yes
C3 . C8 . C15 . N3 . -178.6(2) yes
C9 . C8 . C15 . O2 . -179.3(2) yes
C9 . C8 . C15 . N3 . 2.0(3) yes
C6 . C10 . C11 . N4 . 0.9(3) yes
C6 . C10 . C11 . N5 . -178.5(2) yes
C19 . C10 . C11 . N4 . 174.9(2) yes
C19 . C10 . C11 . N5 . -4.5(4) yes
C6 . C10 . C19 . O4 . -5.1(4) yes
C6 . C10 . C19 . N6 . 172.9(2) yes
C11 . C10 . C19 . O4 . -177.5(2) yes
C11 . C10 . C19 . N6 . 0.5(3) yes
N1 . C20 . C21 . C22 . 178.9(2) yes
C25 . C20 . C21 . C22 . 1.7(4) yes
N1 . C20 . C25 . C24 . -179.7(2) yes
C21 . C20 . C25 . C24 . -2.5(4) yes
C20 . C21 . C22 . C23 . -0.1(4) yes
C21 . C22 . C23 . C24 . -0.7(4) yes
C22 . C23 . C24 . C25 . -0.0(4) yes
C23 . C24 . C25 . C20 . 1.6(4) yes
N4 . C26 . C27 . C28 . 177.7(2) yes
C31 . C26 . C27 . C28 . 1.2(4) yes
N4 . C26 . C31 . C30 . -176.5(2) yes
C27 . C26 . C31 . C30 . 0.1(4) yes
C26 . C27 . C28 . C29 . -1.6(4) yes
C27 . C28 . C29 . C30 . 0.7(4) yes
C28 . C29 . C30 . C31 . 0.5(4) yes
C29 . C30 . C31 . C26 . -0.9(4) yes

loop_
_geom_contact_atom_site_label_1
_geom_contact_site_symmetry_1
_geom_contact_atom_site_label_2
_geom_contact_site_symmetry_2
_geom_contact_distance
_geom_contact_publ_flag
F1 . F2 . 2.263(3) yes
F1 . F3 . 2.250(3) yes
F1 . F4 . 2.243(3) yes
F1 . N1 . 3.041(3) yes
F1 . N2 . 3.500(3) yes
F1 . N5 3_555 3.434(3) yes
F1 . C2 . 3.345(3) yes
F1 . C3 . 3.523(3) yes
F1 . C8 . 3.300(3) yes
F1 . C9 . 2.991(3) yes
F1 . C17 3_555 3.595(4) yes
F1 . C21 . 3.265(3) yes
F1 . B1 . 1.397(4) yes
F1 . H11 3_555 2.870(4) no
F1 . H13 . 2.458(3) no
F1 . H15 3_455 3.477(4) no
F1 . H16 3_455 2.880(4) no
F1 . H22 3_555 2.869(4) no
F2 . F3 . 2.250(3) yes
F2 . F4 . 2.251(3) yes
F2 . O3 3_555 3.503(4) yes
F2 . N5 3_555 3.472(3) yes
F2 . N6 3_555 3.053(3) yes
F2 . C16 1_565 3.434(4) yes
F2 . C17 3_555 3.080(4) yes
F2 . C18 3_555 3.537(4) yes
F2 . C19 3_555 3.434(4) yes
F2 . B1 . 1.366(4) yes
F2 . H10 1_565 3.362(4) no
F2 . H12 1_565 2.784(4) no
F2 . H19 2_666 3.454(4) no
F2 . H20 2_666 2.826(4) no
F2 . H24 3_555 3.076(4) no
F3 . F4 . 2.244(3) yes
F3 . O3 1_565 2.985(3) yes
F3 . N5 1_565 3.008(3) yes
F3 . N6 1_565 3.135(3) yes
F3 . C16 1_565 3.359(4) yes
F3 . C17 1_565 2.738(3) yes
F3 . C23 3_455 3.554(4) yes
F3 . C24 3_455 3.287(4) yes
F3 . B1 . 1.384(4) yes
F3 . H12 1_565 2.902(4) no
F3 . H15 3_455 3.022(4) no
F3 . H16 3_455 2.603(4) no
F3 . H22 3_555 2.787(4) no
F3 . H25 1_565 3.358(4) no
F4 . N2 . 3.218(3) yes
F4 . N3 . 2.996(3) yes
F4 . C8 . 3.173(3) yes
F4 . C9 . 3.238(3) yes
F4 . C13 . 3.058(3) yes
F4 . C15 . 3.058(3) yes
F4 . C23 3_455 3.469(4) yes
F4 . B1 . 1.366(4) yes
F4 . H4 . 3.381(4) no
F4 . H4 2_576 3.587(4) no
F4 . H6 2_576 3.004(4) no
F4 . H15 3_455 2.481(4) no
F4 . H16 3_455 3.478(4) no
F4 . H20 2_666 3.304(4) no
O1 . N2 . 2.278(3) yes
O1 . N3 . 2.278(3) yes
O1 . C9 . 3.490(3) yes
O1 . C12 . 2.705(3) yes
O1 . C13 . 1.216(3) yes
O1 . C14 . 2.706(3) yes
O1 . C14 2_576 3.529(3) yes
O1 . C15 . 3.583(3) yes
O1 . C23 3_455 3.600(4) yes
O1 . C31 2_566 3.391(4) yes
O1 . H4 . 3.018(3) no
O1 . H4 2_576 2.720(3) no
O1 . H5 . 3.475(4) no
O1 . H6 . 2.392(3) no
O1 . H7 . 2.211(3) no
O1 . H8 . 3.120(3) no
O1 . H9 . 3.219(3) no
O1 . H14 3_455 3.389(4) no
O1 . H15 3_455 3.046(4) no
O1 . H18 2_566 2.529(3) no
O2 . N3 . 2.279(3) yes
O2 . C1 2_566 3.598(3) yes
O2 . C2 2_566 3.461(3) yes
O2 . C3 . 3.077(3) yes
O2 . C4 . 3.138(3) yes
O2 . C8 . 2.368(3) yes
O2 . C9 . 3.593(4) yes
O2 . C13 . 3.572(3) yes
O2 . C14 . 2.703(3) yes
O2 . C15 . 1.220(3) yes
O2 . C25 2_566 3.300(3) yes
O2 . C28 2_666 3.274(4) yes
O2 . C29 2_666 3.397(4) yes
O2 . H2 . 2.479(3) no
O2 . H4 . 2.880(3) no
O2 . H5 . 2.433(3) no
O2 . H6 . 3.577(3) no
O2 . H14 4_565 3.154(4) no
O2 . H17 2_566 2.438(3) no
O2 . H20 2_666 2.984(4) no
O2 . H21 2_666 2.550(3) no
O3 . N4 3_545 3.434(3) yes
O3 . N5 . 2.270(3) yes
O3 . N6 . 2.267(3) yes
O3 . C1 3_545 3.238(3) yes
O3 . C2 3_545 3.437(3) yes
O3 . C3 3_545 3.459(3) yes
O3 . C4 3_545 3.282(3) yes
O3 . C5 3_545 3.026(3) yes
O3 . C6 3_545 2.890(3) yes
O3 . C7 3_545 2.806(3) yes
O3 . C10 3_545 3.531(3) yes
O3 . C11 . 3.472(3) yes
O3 . C16 . 2.671(4) yes
O3 . C17 . 1.204(3) yes
O3 . C18 . 2.668(4) yes
O3 . C19 . 3.566(3) yes
O3 . H3 3_545 3.523(3) no
O3 . H10 . 3.453(4) no
O3 . H11 . 2.832(4) no
O3 . H12 . 2.327(4) no
O3 . H22 3_545 3.600(4) no
O3 . H24 . 2.630(4) no
O3 . H25 . 2.622(4) no
O4 . N6 . 2.288(3) yes
O4 . C1 . 3.062(3) yes
O4 . C6 . 3.060(3) yes
O4 . C10 . 2.368(3) yes
O4 . C11 . 3.592(4) yes
O4 . C12 3_445 2.923(3) yes
O4 . C17 . 3.583(3) yes
O4 . C18 . 2.751(3) yes
O4 . C19 . 1.225(3) yes
O4 . H1 . 2.359(3) no
O4 . H7 3_445 2.804(3) no
O4 . H8 3_445 2.935(3) no
O4 . H9 3_445 2.743(3) no
O4 . H12 3_555 3.251(3) no
O4 . H19 4_454 3.492(4) no
O4 . H23 . 2.307(3) no
O4 . H24 . 3.378(4) no
O4 . H25 . 3.401(4) no
N1 . N2 . 2.438(3) yes
N1 . C1 . 2.418(3) yes
N1 . C2 . 1.405(3) yes
N1 . C3 . 2.293(3) yes
N1 . C8 . 2.247(3) yes
N1 . C9 . 1.366(3) yes
N1 . C12 . 3.013(3) yes
N1 . C20 . 1.446(3) yes
N1 . C21 . 2.444(3) yes
N1 . C25 . 2.433(3) yes
N1 . H1 . 2.609(3) no
N1 . H2 2_566 3.523(3) no
N1 . H8 . 3.028(3) no
N1 . H9 . 2.970(3) no
N1 . H13 . 2.634(3) no
N1 . H17 . 2.570(3) no
N2 . N3 . 2.385(3) yes
N2 . C2 . 3.572(3) yes
N2 . C3 . 3.575(3) yes
N2 . C4 2_566 3.485(3) yes
N2 . C5 2_566 3.429(3) yes
N2 . C8 . 2.411(3) yes
N2 . C9 . 1.358(3) yes
N2 . C12 . 1.476(3) yes
N2 . C13 . 1.407(3) yes
N2 . C15 . 2.863(3) yes
N2 . C20 . 3.105(3) yes
N2 . H2 2_566 3.567(3) no
N2 . H3 2_566 3.479(3) no
N2 . H7 . 1.919(3) no
N2 . H8 . 1.854(3) no
N2 . H9 . 1.879(3) no
N2 . H15 3_455 3.304(4) no
N3 . C7 2_566 3.556(3) yes
N3 . C8 . 2.369(3) yes
N3 . C9 . 2.700(3) yes
N3 . C13 . 1.385(3) yes
N3 . C14 . 1.472(3) yes
N3 . C15 . 1.401(3) yes
N3 . H4 . 1.915(3) no
N3 . H5 . 1.944(3) no
N3 . H6 . 2.016(3) no
N4 . N5 . 2.453(3) yes
N4 . C5 . 2.437(3) yes
N4 . C6 . 2.280(3) yes
N4 . C7 . 1.401(3) yes
N4 . C10 . 2.251(3) yes
N4 . C11 . 1.382(3) yes
N4 . C16 . 3.071(4) yes
N4 . C26 . 1.440(3) yes
N4 . C27 . 2.429(3) yes
N4 . C31 . 2.446(3) yes
N4 . H3 . 2.573(3) no
N4 . H6 2_566 3.577(3) no
N4 . H10 . 2.820(4) no
N4 . H11 . 3.384(4) no
N4 . H18 . 2.606(3) no
N4 . H22 . 2.663(3) no
N5 . N6 . 2.396(3) yes
N5 . C6 . 3.563(3) yes
N5 . C7 . 3.575(3) yes
N5 . C10 . 2.402(3) yes
N5 . C11 . 1.354(3) yes
N5 . C16 . 1.471(3) yes
N5 . C17 . 1.406(3) yes
N5 . C19 . 2.865(3) yes
N5 . C26 . 3.091(4) yes
N5 . C27 . 3.497(4) yes
N5 . H10 . 1.937(3) no
N5 . H11 . 1.923(3) no
N5 . H12 . 2.012(3) no
N5 . H22 . 3.343(4) no
N6 . C10 . 2.368(3) yes
N6 . C11 . 2.704(4) yes
N6 . C17 . 1.392(3) yes
N6 . C18 . 1.465(3) yes
N6 . C19 . 1.397(3) yes
N6 . H23 . 1.990(4) no
N6 . H24 . 1.994(3) no
N6 . H25 . 1.997(3) no
C1 . C2 . 1.371(3) yes
C1 . C3 . 2.565(3) yes
C1 . C4 . 3.196(4) yes
C1 . C5 . 3.197(4) yes
C1 . C6 . 1.395(3) yes
C1 . C7 . 2.542(3) yes
C1 . C9 . 3.547(4) yes
C1 . C10 . 2.494(3) yes
C1 . C19 . 3.146(4) yes
C1 . C20 . 2.877(3) yes
C1 . C21 . 3.497(4) yes
C1 . C25 . 3.476(4) yes
C1 . H1 . 0.99(3) no
C1 . H5 2_566 3.146(4) no
C1 . H11 3_555 3.389(4) no
C1 . H12 3_555 3.320(4) no
C1 . H17 . 3.495(4) no
C2 . C3 . 1.441(3) yes
C2 . C4 . 2.544(3) yes
C2 . C5 . 3.137(4) yes
C2 . C6 . 2.464(3) yes
C2 . C7 . 3.087(3) yes
C2 . C8 . 2.280(3) yes
C2 . C9 . 2.250(3) yes
C2 . C15 2_566 3.425(3) yes
C2 . C20 . 2.492(3) yes
C2 . C21 . 3.326(4) yes
C2 . C25 . 3.306(4) yes
C2 . H1 . 2.049(3) no
C2 . H2 . 3.337(4) no
C2 . H13 . 3.366(4) no
C2 . H17 . 3.265(4) no
C3 . C4 . 1.401(3) yes
C3 . C5 . 2.512(3) yes
C3 . C6 . 3.147(4) yes
C3 . C7 . 3.107(4) yes
C3 . C8 . 1.416(3) yes
C3 . C8 2_566 3.352(3) yes
C3 . C9 . 2.271(3) yes
C3 . C15 . 2.590(3) yes
C3 . C15 2_566 3.581(3) yes
C3 . H1 . 3.418(4) no
C3 . H2 . 1.988(3) no
C3 . H3 . 3.331(4) no
C4 . C5 . 1.383(3) yes
C4 . C6 . 3.161(4) yes
C4 . C7 . 2.484(4) yes
C4 . C8 . 2.522(3) yes
C4 . C8 2_566 3.584(4) yes
C4 . C9 2_566 3.378(3) yes
C4 . C15 . 3.197(4) yes
C4 . H2 . 0.95(2) no
C4 . H3 . 2.012(3) no
C4 . H9 2_566 3.597(4) no
C4 . H24 3_555 3.428(4) no
C5 . C6 . 2.559(4) yes
C5 . C7 . 1.386(3) yes
C5 . C11 . 3.574(4) yes
C5 . C13 2_566 3.387(3) yes
C5 . C26 . 2.915(3) yes
C5 . C31 . 3.337(4) yes
C5 . H2 . 2.004(4) no
C5 . H3 . 0.97(3) no
C5 . H9 2_566 3.437(4) no
C5 . H18 . 3.338(4) no
C5 . H24 3_555 3.490(4) no
C6 . C7 . 1.430(3) yes
C6 . C10 . 1.414(3) yes
C6 . C11 . 2.262(3) yes
C6 . C14 2_566 3.520(4) yes
C6 . C19 . 2.586(4) yes
C6 . H1 . 2.016(3) no
C6 . H3 . 3.371(4) no
C6 . H5 2_566 3.067(4) no
C6 . H6 2_566 3.328(4) no
C6 . H12 3_555 3.194(4) no
C7 . C10 . 2.281(4) yes
C7 . C11 . 2.257(4) yes
C7 . C13 2_566 3.536(4) yes
C7 . C26 . 2.493(3) yes
C7 . C27 . 3.383(4) yes
C7 . C31 . 3.256(4) yes
C7 . H1 . 3.366(4) no
C7 . H2 . 3.296(4) no
C7 . H3 . 2.012(3) no
C7 . H6 2_566 3.460(4) no
C7 . H18 . 3.245(4) no
C7 . H22 . 3.554(4) no
C8 . C9 . 1.383(3) yes
C8 . C13 . 2.795(4) yes
C8 . C15 . 1.435(3) yes
C8 . H2 . 2.655(3) no
C9 . C12 . 2.505(4) yes
C9 . C13 . 2.380(3) yes
C9 . C15 . 2.450(3) yes
C9 . C20 . 2.544(3) yes
C9 . C21 . 3.380(4) yes
C9 . C25 . 3.419(4) yes
C9 . H2 2_566 3.370(3) no
C9 . H7 . 3.175(4) no
C9 . H8 . 2.695(4) no
C9 . H9 . 2.667(4) no
C9 . H13 . 3.384(4) no
C9 . H17 . 3.434(4) no
C10 . C11 . 1.375(3) yes
C10 . C17 . 2.784(4) yes
C10 . C19 . 1.438(3) yes
C10 . H1 . 2.630(3) no
C10 . H5 2_566 3.363(4) no
C10 . H6 2_566 3.392(4) no
C10 . H12 3_555 3.133(4) no
C11 . C16 . 2.518(4) yes
C11 . C17 . 2.372(4) yes
C11 . C19 . 2.451(4) yes
C11 . C26 . 2.532(4) yes
C11 . C27 . 3.210(4) yes
C11 . C31 . 3.559(4) yes
C11 . H6 2_566 3.553(4) no
C11 . H10 . 2.616(4) no
C11 . H11 . 2.928(4) no
C11 . H12 . 3.226(4) no
C11 . H22 . 3.139(4) no
C12 . C13 . 2.458(4) yes
C12 . C20 . 2.964(4) yes
C12 . C21 . 3.401(4) yes
C12 . C23 3_455 3.532(4) yes
C12 . C25 . 3.440(4) yes
C12 . H3 2_566 3.507(4) no
C12 . H7 . 0.895(7) no
C12 . H8 . 0.810(8) no
C12 . H9 . 0.857(6) no
C12 . H15 3_455 3.397(4) no
C12 . H18 2_566 3.567(4) no
C12 . H23 3_455 3.293(4) no
C13 . C14 . 2.430(4) yes
C13 . C15 . 2.484(3) yes
C13 . H3 2_566 3.583(4) no
C13 . H4 . 2.802(4) no
C13 . H4 2_576 3.357(4) no
C13 . H5 . 3.095(4) no
C13 . H6 . 2.521(3) no
C13 . H7 . 2.385(4) no
C13 . H8 . 2.871(4) no
C13 . H9 . 2.924(4) no
C13 . H15 3_455 3.161(4) no
C13 . H18 2_566 3.363(4) no
C14 . C15 . 2.449(4) yes
C14 . C22 4_565 3.500(4) yes
C14 . C23 4_565 3.390(4) yes
C14 . H4 . 0.846(9) no
C14 . H4 2_576 3.347(5) no
C14 . H5 . 0.92(2) no
C14 . H6 . 0.94(1) no
C14 . H14 4_565 2.874(4) no
C14 . H15 4_565 2.815(4) no
C15 . H2 . 2.870(3) no
C15 . H4 . 2.742(4) no
C15 . H5 . 2.518(3) no
C15 . H6 . 3.215(4) no
C15 . H17 2_566 3.463(4) no
C15 . H20 2_666 3.529(4) no
C16 . C17 . 2.430(4) yes
C16 . C26 . 3.047(4) yes
C16 . C27 . 3.318(4) yes
C16 . H10 . 0.825(9) no
C16 . H11 . 0.94(1) no
C16 . H12 . 0.995(6) no
C16 . H13 3_545 3.569(4) no
C16 . H19 2_656 3.128(4) no
C16 . H22 . 3.360(4) no
C17 . C18 . 2.416(4) yes
C17 . C19 . 2.481(4) yes
C17 . H10 . 3.101(4) no
C17 . H11 . 2.745(4) no
C17 . H12 . 2.462(4) no
C17 . H23 . 3.206(4) no
C17 . H24 . 2.629(4) no
C17 . H25 . 2.638(4) no
C18 . C19 . 2.464(4) yes
C18 . H9 3_445 3.489(4) no
C18 . H23 . 0.95(1) no
C18 . H24 . 0.95(2) no
C18 . H25 . 0.950(4) no
C19 . H1 . 2.793(4) no
C19 . H12 3_555 3.166(4) no
C19 . H23 . 2.472(4) no
C19 . H24 . 3.058(4) no
C19 . H25 . 3.083(4) no
C20 . C21 . 1.380(3) yes
C20 . C22 . 2.382(4) yes
C20 . C23 . 2.748(4) yes
C20 . C24 . 2.386(4) yes
C20 . C25 . 1.382(3) yes
C20 . H1 . 2.526(3) no
C20 . H8 . 2.817(4) no
C20 . H9 . 2.779(4) no
C20 . H13 . 2.058(3) no
C20 . H14 . 3.350(4) no
C20 . H16 . 3.266(4) no
C20 . H17 . 2.010(4) no
C21 . C22 . 1.390(4) yes
C21 . C23 . 2.404(4) yes
C21 . C24 . 2.781(4) yes
C21 . C25 . 2.410(4) yes
C21 . H1 . 2.972(4) no
C21 . H8 . 2.924(4) no
C21 . H9 . 3.459(4) no
C21 . H11 3_555 3.299(4) no
C21 . H13 . 0.971(6) no
C21 . H14 . 2.141(4) no
C21 . H15 . 3.394(4) no
C21 . H17 . 3.242(4) no
C22 . C23 . 1.383(4) yes
C22 . C24 . 2.397(4) yes
C22 . C25 . 2.770(4) yes
C22 . H4 4_464 3.288(4) no
C22 . H5 4_464 2.983(4) no
C22 . H7 3_445 3.450(4) no
C22 . H13 . 2.057(4) no
C22 . H14 . 1.0596(5) no
C22 . H15 . 2.172(4) no
C22 . H16 . 3.296(4) no
C22 . H21 3_555 3.481(4) no
C23 . C24 . 1.380(4) yes
C23 . C25 . 2.394(4) yes
C23 . H4 4_464 3.241(4) no
C23 . H5 4_464 3.015(4) no
C23 . H6 4_464 3.419(4) no
C23 . H7 3_445 3.289(4) no
C23 . H8 3_445 3.031(4) no
C23 . H13 . 3.281(4) no
C23 . H14 . 2.100(4) no
C23 . H15 . 1.0607(6) no
C23 . H16 . 2.076(4) no
C23 . H17 . 3.248(4) no
C24 . C25 . 1.385(4) yes
C24 . H8 3_445 3.161(4) no
C24 . H14 . 3.339(4) no
C24 . H15 . 2.061(4) no
C24 . H16 . 0.985(6) no
C24 . H17 . 2.040(4) no
C24 . H21 1_455 3.260(4) no
C24 . H22 1_455 3.585(4) no
C25 . H1 . 3.003(4) no
C25 . H2 2_566 3.517(4) no
C25 . H8 . 3.502(4) no
C25 . H9 . 2.916(4) no
C25 . H13 . 3.290(4) no
C25 . H15 . 3.315(4) no
C25 . H16 . 2.042(4) no
C25 . H17 . 0.938(5) no
C25 . H21 1_455 3.044(4) no
C26 . C27 . 1.383(3) yes
C26 . C28 . 2.391(4) yes
C26 . C29 . 2.763(4) yes
C26 . C30 . 2.392(4) yes
C26 . C31 . 1.387(4) yes
C26 . H3 . 2.531(3) no
C26 . H10 . 2.578(4) no
C26 . H11 . 3.151(4) no
C26 . H18 . 2.004(4) no
C26 . H19 . 3.306(4) no
C26 . H21 . 3.351(4) no
C26 . H22 . 2.057(4) no
C27 . C28 . 1.395(4) yes
C27 . C29 . 2.412(4) yes
C27 . C30 . 2.780(4) yes
C27 . C31 . 2.416(4) yes
C27 . H3 . 3.266(4) no
C27 . H10 . 3.053(4) no
C27 . H11 . 3.012(4) no
C27 . H13 3_545 3.506(4) no
C27 . H16 1_655 3.355(4) no
C27 . H18 . 3.229(4) no
C27 . H20 . 3.411(4) no
C27 . H21 . 2.115(4) no
C27 . H22 . 0.919(6) no
C27 . H25 3_555 3.060(4) no
C28 . C29 . 1.382(4) yes
C28 . C30 . 2.391(4) yes
C28 . C31 . 2.777(4) yes
C28 . H13 3_545 3.468(4) no
C28 . H14 3_545 3.227(4) no
C28 . H16 1_655 3.435(4) no
C28 . H17 1_655 3.330(4) no
C28 . H19 . 3.358(5) no
C28 . H20 . 2.205(4) no
C28 . H21 . 1.0812(5) no
C28 . H22 . 1.973(4) no
C28 . H25 3_555 3.531(5) no
C29 . C30 . 1.381(4) yes
C29 . C31 . 2.408(4) yes
C29 . H18 . 3.224(4) no
C29 . H19 . 2.144(5) no
C29 . H20 . 1.0431(6) no
C29 . H21 . 2.166(5) no
C29 . H22 . 3.207(4) no
C29 . H24 4_555 3.280(5) no
C30 . C31 . 1.392(4) yes
C30 . H3 . 3.561(4) no
C30 . H10 2_656 3.451(4) no
C30 . H18 . 2.009(4) no
C30 . H19 . 1.0403(5) no
C30 . H19 2_656 3.545(6) no
C30 . H20 . 1.992(4) no
C30 . H21 . 3.389(5) no
C30 . H23 4_555 3.348(5) no
C30 . H24 4_555 3.366(5) no
C31 . H3 . 2.721(4) no
C31 . H7 2_566 3.492(4) no
C31 . H10 . 2.983(4) no
C31 . H18 . 0.90(1) no
C31 . H19 . 2.066(4) no
C31 . H19 2_656 3.514(4) no
C31 . H20 . 3.272(4) no
C31 . H22 . 3.269(4) no
B1 . H12 1_565 3.386(4) no
B1 . H15 3_455 3.149(4) no
B1 . H16 3_455 3.155(4) no
B1 . H22 3_555 3.369(5) no

#==============================================================================

# Additional structures and associated data_? identifiers
# should be added at this point if there is more than one 
# structure analysis in the CIF.

#==============================================================================

#     End of CIF

#==============================================================================
